# Supplementary material
Source: PubMed Central journal article supplement (PMC3781599)
Supplement: NIHMS512212-supplement-supplement_1.pdf [file NIHMS512212-supplement-supplement_1.pdf]

## Supplemental Table 1A – Accession numbers of MBP, MPZ, PLP1

| Species           | MBP                                | MPZ                                | PLP1                               |
|-------------------|------------------------------------|------------------------------------|------------------------------------|
| <b>MAMMALS</b>    |                                    |                                    |                                    |
| Alpaca            | None                               | <a href="#">ENSVPAT00000008432</a> | ENSVPAT00000000075                 |
| Armadillo         | None                               | None                               | <a href="#">ENSDNOT00000017411</a> |
| Baboon            | None                               | None                               | None                               |
| Bovine            | MBBOB+                             | NP_001072975                       | P04116                             |
| Bushbaby          | <a href="#">ENSOGAT00000000456</a> | <a href="#">ENSOGAT00000013747</a> | ENSOGAT00000015082                 |
| Canine            | XP_533367                          | XP_545771                          | P23294                             |
| Chimpanzee        | P06906                             | XP_001173975                       | XP_001141168                       |
| Crab eating mac.  | eCJ478697                          | None                               | BAC20603                           |
| Dolphin           | ENSTTRT00000003287                 | ENSTTRP00000008755                 | ENSTTRT00000003943                 |
| Elephant, African | <a href="#">ENSLAFT00000007757</a> | <a href="#">ENSLAFT00000021479</a> | ENSLAFT00000014910                 |
| Feline            | ENSFCAT00000008683                 | ENSFCAT00000000498                 | <a href="#">ENSFCAT00000013526</a> |
| Gorilla           | ENSGGOT00000009629                 | ENSGGOT00000008047                 | <a href="#">ENSGGOT00000016566</a> |
| Guinea Pig        | P25188                             | ENSCPOT00000023250                 | <a href="#">ENSCPOT00000015829</a> |
| Hedgehog          | None                               | None                               | ENSEEUT00000005304                 |
| Horse             | P83487                             | ENSECAT00000009424                 | XP_001493124                       |
| Human             | AAA59562                           | NP_000521                          | NP_000524                          |
| Hyrax             | <a href="#">ENSPCAT00000011982</a> | ENSPCAT00000014503                 | <a href="#">ENSPCAT00000012182</a> |
| Kangaroo rat      | ENSDORT00000010278                 | <a href="#">ENSDORT00000014970</a> | <a href="#">ENSDORT00000006789</a> |
| Lesser hedgehog   | <a href="#">ENSETET00000015980</a> | ENSETET00000015764                 | <a href="#">ENSETET00000006310</a> |
| Megabat           | <a href="#">ENSPVAT00000008208</a> | ENSPVAT00000005542                 | ENSPVAT00000014591                 |
| Microbat          | <a href="#">ENSMLUT00000011150</a> | <a href="#">ENSMLUT00000007740</a> | <a href="#">ENSMLUT00000011049</a> |
| Mouse lemur       | <a href="#">ENSMICT00000004039</a> | ENSMICT00000007309                 | ENSMICT00000003054                 |
| Murine            | AAA39496                           | NP_032649                          | NP_035253                          |
| Opossum, BT       | <a href="#">eEC290610</a>          | None                               | None                               |
| Opossum, STG      | ENSMODT00000015676                 | ENSMODT00000006336                 | ENSMODT00000014707                 |
| Orangutan, Born.  | ENSPPYT00000010798                 | ENSPPYT00000000726                 | ENSPPYT00000024015                 |
| Orangutan, Sum.   | NP_001127091                       | None                               | NP_001126498                       |
| Ovine             | <a href="#">eEE795584</a>          | None                               | None                               |
| Pika              | <a href="#">ENSOANT00000022363</a> | None                               | None                               |
| Platypus          | <a href="#">ENSOANT00000022363</a> | None                               | ENSOANT00000006721                 |
| Porcine           | NP_001001546                       | XP_001925038                       | CAB51809                           |
| Rabbit            | P25274                             | eEB377394, 3EB378738               | P47789                             |
| Rat               | CAA10806                           | NP_058723                          | NP_112252                          |
| Rhesus macaque    | eBQ807515                          | XP_001118030                       | XP_001089214                       |
| Shrew             | None                               | None                               | <a href="#">ENSSART00000006859</a> |
| Sloth             | <a href="#">ENSCHOT00000007692</a> | None                               | None                               |
| Squirrel          | <a href="#">ENSSTOT00000007039</a> | None                               | <a href="#">ENSSTOT00000004065</a> |
| Tarsier           | <a href="#">ENSTSYT00000005132</a> | <a href="#">ENSTSYT00000001809</a> | ENSTSYT00000012700                 |
| Tree shrew        | None                               | <a href="#">ENSTBET00000008027</a> | ENSTBET00000005959                 |
| #                 | 19                                 | 19                                 | 24                                 |

| AVES                      |               |                    |                                 |
|---------------------------|---------------|--------------------|---------------------------------|
| Chicken                   | NP_990611     | P37301             | NP_990608                       |
| Mallard duck              | None          | None               | None                            |
| Turkey, wild              | None          | eEH285837          | eEH285764                       |
| Zebra finch               | ACH45448      | None               | AAB32825                        |
| #                         | 2             | 2                  | 2                               |
| REPTILES                  |               |                    |                                 |
| Anole lizard              | eFG784361     | ENSACAT00000001455 | eFG692205, eFG692349, eFG649528 |
| Jap. four-lined rat snake | eAU312318     | None               | None                            |
| Japanese gecko            | AAW51381      | None               | AAW79015, AY880400              |
| Soft shell turtle         | None          | None               | AAL12850                        |
| #                         | 3             | 1                  | 2                               |
| AMPHIBIANS                |               |                    |                                 |
| African clawed frog       | NP_001089351  | NP_001091356       | P35801                          |
| Chinese newt              | None          | None               | AAL12852                        |
| Rubber eel                | None          | None               | AAL12851                        |
| Salamander                | eCN042468     | None               | None                            |
| Western clawed frog       | Xentr4_189083 | NP_001072741       | NP_001027507                    |
| #                         | 2             | 2                  | 2                               |
| TELEOSTS                  |               |                    |                                 |
| Channel catfish           | eBE212918     | eFD157275          | None                            |
| Japanese Medaka           | eBJ710447     | ENSORL00000003190  | DT981775                        |
| Flathead minnow           | eDT249557     | eDT208407          | DT234670                        |
| Rainbow trout             | eBX078034     | AAB34399           | eBX874999                       |
| Three-spine stickleback   | eDW641394     | eDN730737          | eDT981775                       |
| Zebrafish                 | XP_001340316  | CK360078, DT057389 | NP_783166                       |
| #                         | 5             | 6                  | 5                               |
| ELASMOBRANCHS             |               |                    |                                 |
| Horn shark                | P20952        | P20938             | None                            |
| Little skate              | eGD242657     | eCV067604          | None                            |
| Spiny dogfish             | Q91439        | None               | P36963                          |
| Pacific electric ray      | eEW692506     | eEW691411          | None                            |
| #                         | 2             | 3                  | 1                               |
| AGNATHANS                 |               |                    |                                 |
| Sea lamprey               | None          | GENSCAN00000126520 | None                            |

## Supplemental Table 1B – Accession numbers of PMP2, PMP22, STMN1

| Species           | PMP2                               | PMP22                              | STMN1                              |
|-------------------|------------------------------------|------------------------------------|------------------------------------|
| <b>MAMMALS</b>    |                                    |                                    |                                    |
| Alpaca            | ENSVPAT00000001141                 | <a href="#">ENSVPAT00000003889</a> | ENSVPAT00000001226                 |
| Armadillo         | <a href="#">ENSDNOT00000002173</a> | <a href="#">ENSDNOT00000013994</a> | None                               |
| Baboon            | None                               | None                               | eFC161082                          |
| Bovine            | ENSBTAT00000046521                 | NP_001094626                       | ENSBTAT00000018284                 |
| Bushbaby          | ENSOGAT00000012167                 | None                               | ENSOGAT00000002111*                |
| Canine            | ENSCAFT00000013434                 | ENSCAFT00000028432                 | ENSCAFT00000020202                 |
| Chimpanzee        | ENSPTRT00000037713                 | ENSPTRT00000016192                 | ENSPTRT00000000739                 |
| Crab eating mac.  | BAE91065                           | None                               | eDK580985                          |
| Dolphin           | ENSTTRT00000006950                 | ENSTTRT00000003678                 | ENSTTRT00000012491                 |
| Elephant, African | ENSLAFT00000000603                 | <a href="#">ENSLAFT00000013428</a> | ENSLAFT00000006088*                |
| Feline            | ENSFCAT00000005245                 | None                               | ENSFCAT00000012801*                |
| Gorilla           | None                               | ENSGGOT00000003166                 | None                               |
| Guinea Pig        | None                               | <a href="#">ENSCPOT00000002173</a> | ENSCPOT00000011177                 |
| Hedgehog          | <a href="#">ENSEEUT00000004002</a> | <a href="#">ENSEEUT00000002837</a> | ENSEEUT00000009338                 |
| Horse             | XP_001489476                       | ENSECAT00000002719                 | ENSECAT00000023109                 |
| Human             | NP_002668                          | NP_000295                          | NP_005554                          |
| Hyrax             | ENSPCAT00000008901                 | None                               | <a href="#">ENSPCAT00000002461</a> |
| Kangaroo rat      | <a href="#">ENSDORT00000002228</a> | <a href="#">ENSDORT00000008584</a> | <a href="#">ENSDORT00000001797</a> |
| Lesser hedgehog   | ENSETET00000010172                 | ENSETET00000000152                 | <a href="#">ENSETET00000007729</a> |
| Megabat           | ENSPVAT00000014291                 | ENSPVAT00000014482                 | <a href="#">ENSPVAT00000006344</a> |
| Microbat          | ENSMLUT00000009522                 | ENSMICT00000001902                 | ENSMLUT00000010755                 |
| Mouse lemur       | None                               | ENSMLUT00000002798                 | <a href="#">ENSMICT00000010221</a> |
| Murine            | NP_001025476                       | NP_032911                          | NP_062615                          |
| Opossum, BT       | None                               | eEC375672                          | None                               |
| Opossum, STG      | ENSMODT00000008242                 | ENSMODT00000009880                 | ENSMODT00000017863                 |
| Orangutan, Born.  | ENSPPYT00000021816                 | ENSPPYT00000009363                 | <a href="#">ENSPPYT00000002026</a> |
| Orangutan, Sum.   | None                               | eCR764290                          | eCR854721                          |
| Ovine             | None                               | eEE865051                          | eEE768170                          |
| Pika              | ENSOPRT00000016926                 | <a href="#">ENSOPRT00000006270</a> | ENSOPRT00000001342                 |
| Platypus          | ENSOANT00000012628                 | None                               | XP_001514288                       |
| Porcine           | XP_001927556                       | eDB804612                          | eEW495542                          |
| Rabbit            | NP_001075699                       | eEB375621                          | ENSOCUT00000008008                 |
| Rat               | NP_001102984                       | NP_058733                          | NP_058862149                       |
| Rhesus macaque    | ENSMMUT00000028271                 | ENSMMUT00000003123                 | eCB390613                          |
| Shrew             | ENSSART00000002053                 | ENSSART00000004903                 | ENSSART00000011044                 |
| Sloth             | <a href="#">ENSCHOT00000004812</a> | <a href="#">ENSCHOT00000008082</a> | ENSCHOT00000000883                 |
| Squirrel          | ENSSTOT00000008528                 | ENSSTOT00000013019                 | ENSSTOT00000002885                 |
| Tarsier           | ENSTSYT00000004596                 | ENSTSYT00000010143                 | <a href="#">ENSTSYT00000007307</a> |
| Tree shrew        | None                               | ENSTBET00000004968                 | <a href="#">ENSTBET00000011358</a> |
| #                 | 27                                 | 25                                 | 28                                 |

| AVES                    |                    |                    |                     |
|-------------------------|--------------------|--------------------|---------------------|
| Chicken                 | XP_418309          | None               | NP_001026374        |
| Mallard duck            | None               | CD766027           | eDR764207           |
| Turkey, wild            | None               | ENSTGUT00000005234 | eEH293791           |
| Zebra finch             | ENSTGUT00000012154 | ENSSTOT00000013019 | eFE735052           |
| #                       | 2                  | 3                  | 4                   |
| REPTILES                |                    |                    |                     |
| Anole lizard            | eFG709926          | eFG684496          | eFG684496           |
| Japanese gecko          | eEB169393          | eEB168047          | eEB168047           |
| #                       | 2                  | 2                  | 2                   |
| AMPHIBIANS              |                    |                    |                     |
| African clawed frog     | NP_001083636       | NP_001080285       | NP_001080672        |
| Salamander              | None               | None               | eCN046082           |
| Western clawed frog     | NP_001107544       | NP_001025552       | NP_001007972        |
| #                       | 2                  | 2                  | 3                   |
| TELEOSTS                |                    |                    |                     |
| Channel catfish         | None               | eFD309435          | eBM494561           |
| Japanese Medaka         | None               | eDT121114          | eAM321464           |
| Flathead minnow         | None               | eDK106651          | eDT313958           |
| Rainbow trout           | None               | eCA386240          | eBX073275           |
| Three-spine stickleback | None               | eDN699299          | ENSGACT00000009808  |
| Zebrafish               | None               | NP_958468          | ENS DART00000007906 |
| #                       | 0                  | 6                  | 6                   |
| ELASMOBRANCHS           |                    |                    |                     |
| Little skate            | None               | None               | eFF600814           |
| Spiny dogfish           | None               | eEW691433          | None                |
| Pacific electric ray    | None               | None               | eEW693188           |
| #                       | 0                  | 1                  | 2                   |
| AGNATHANS               |                    |                    |                     |
| Sea lamprey             | None               | eFD700815          | eDW022498           |

Legend: Accession numbers for vertebrate orthologs of the six genes evaluated in this study are included. Blue lettering is used to indicate incomplete sequences. The proteins are sorted into mammalian, aves, diapsids, amphibians, teleost and cartilaginous fishes and agnathans. Only proteins that identify mouse orthologs as best hits are included and when two teleost fish genes are identified the one closest to the mouse ortholog is included.

## Supplemental Table 2– Pair-wise and group comparisons of full-length proteins of species from different vertebrate taxa

| Classes       | Mammals |     |                   |                  | Aves |                 | Reptiles |    | Amphibians |    | Chondrichthyes   |                 | Teleosts        |                 |    | Agn.            |
|---------------|---------|-----|-------------------|------------------|------|-----------------|----------|----|------------|----|------------------|-----------------|-----------------|-----------------|----|-----------------|
| Species/Prot  | PT      | BT  | ET                | Md <sup>1</sup>  | GG   | TG              | GJ       | AC | XL         | XT | HF               | SA              | OM              | GA              | DR | PM              |
| Human/MBP     | 97      | 90  | 92                | 86 <sup>2</sup>  | 69   | 67              | 63       | 61 | 59         | 63 | 36               | 35              | 29              | 31              | 30 | --              |
| Mouse/MBP     | 92      | 90  | 90                | 86 <sup>2</sup>  | 68   | 65              | 60       | 58 | 58         | 62 | 37               | 35              | 29              | 30              | 29 | --              |
| Intra-species | 66      |     |                   |                  | 94   |                 | 76       |    | 90         |    | 79 <sup>3</sup>  |                 | 46              |                 |    |                 |
| Human/MPZ     | 100     | 93  | 96                | 92 <sup>4</sup>  | 77   | 76 <sup>5</sup> | --       | 75 | 58         | 61 | 54               | 50 <sup>6</sup> | 53              | 51 <sup>7</sup> | 48 | 32 <sup>8</sup> |
| Mouse/MPZ     | 93      | 92  | 96                | 94 <sup>7</sup>  | 77   | 76 <sup>5</sup> | --       | 78 | 59         | 63 | 54               | 50 <sup>6</sup> | 50              | 50 <sup>7</sup> | 48 | 30 <sup>8</sup> |
| Intra-species | 80      |     |                   |                  | 92   |                 |          |    | 92         |    | 85               |                 | 65 <sup>9</sup> |                 |    |                 |
| Human/PLP1    | 99      | 99  | 93                | 94 <sup>9</sup>  | 94   | 90              | 88       | 86 | 70         | 70 | --               | 58              | 58              | 58              | 58 | --              |
| Intra-species | 83      |     |                   |                  | 94   |                 | 93       |    | 96         |    |                  |                 | 79              |                 |    |                 |
| Human/PMP2    | 100     | 92  | 86                | 77 <sup>10</sup> | 80   | 77              | 77       | 78 | 59         | 58 | --               | --              | --              | --              | -- | --              |
| Mouse/PMP2    | 87      | 86  | 84                | 73 <sup>10</sup> | 78   | 76              | 74       | 77 | 58         | 58 | --               | --              | --              | --              | -- | --              |
| Intra-species | 47.9    |     |                   |                  | 93   |                 | 83       |    | 57         |    |                  |                 |                 |                 |    |                 |
| Human/PMP22   | 100     | 93  | 91                | 83 <sup>11</sup> | 78   | 76              | 76       | 79 | 74         | 78 | 62 <sup>12</sup> | --              | 58              | 67              | 51 | 47              |
| Mouse/PMP22   | 86      | 87  | 83                | 78 <sup>11</sup> | 78   | 78              | 73       | 75 | 74         | 77 | 62               | --              | 57              | 66              | 48 | 46              |
| Intraspecies  | 63      |     |                   |                  | 97   |                 | 78       |    | 91         |    |                  |                 | 43              |                 |    |                 |
| Human STMN1   | 100     | 100 | 100 <sup>13</sup> | 95 <sup>14</sup> | 93   | 93              | 93       | 89 | 79         | 78 | 76               | 82              | 69              | 73              | 74 | 63              |
| Mouse STMN1   | 99      | 99  | 99 <sup>13</sup>  | 95 <sup>14</sup> | 91   | 91              | 93       | 87 | 79         | 78 | 75               | 81              | 68              | 72              | 71 | 63              |
| Intra-species | 85      |     |                   |                  | 100  |                 |          |    | 96         |    | 91               |                 | 71              |                 |    |                 |

<sup>1</sup>Md – most disparate mammalian sequences (based on identity) compared with mouse are shown.

<sup>2</sup>Short-tailed gray opossum MBP was most different from mouse MBP.

<sup>3</sup>To calculate the identities among four shark MBP sequences, exon V (absent from the little skate and Pacific electric ray EST sequences) was removed from horn shark and spiny dogfish MBPs before all were aligned.

<sup>4</sup>Short-tailed gray opossum MPZ was most different from mouse MPZ.

<sup>5</sup>Wild turkey MPZ was used as no zebra finch MPZ was identified.

<sup>6</sup>Pacific electric ray MPZ was used as no spiny dogfish MPZ was identified.

<sup>7</sup>Stickleback MPZ (lacks exon 6) was aligned with exons 1-5 of human and mouse MPZ and only the smaller (lacking exon 6) teleost MPZ molecules were used for the intra-species comparison.

<sup>8</sup>Only the portion of the lamprey MPZ model (1-118, Fig. 5) that overlapped human and mouse MPZ was used.

<sup>9</sup>Besides lesser hedgehog (ET), which is already included, duckbill platypus PLP1 was most different from mouse PLP1.

<sup>10</sup>Duckbill platypus PMP2 sequence was most different from mouse.

<sup>11</sup>Microbat PMP22 sequence was most different from mouse PMP22.

<sup>12</sup>Only a single elasmobranch, Pacific electric ray, PMP22 sequence was identified.

<sup>13</sup>Hedgehog STMN1 was used as no lesser hedgehog STMN1 was found.

<sup>14</sup>Squirrel STMN1 was most different from mouse PMP2 STMN1.

Legend: All full-length sequences that we obtained (Supplemental Tables 1A and 1B) were used in this table. The align program from Vector NTI versions 10 and 11 (Methods) was used to conduct the alignments. Values are percent identities between designated pair-wise comparisons and among (intra-specie) mammalian sequences. Background shading depicts

percent identities in the ranges of 90-100%, 80-89%, 70-79% and 60-69%. Abbreviations for species used in pair-wise alignments are based on scientific names: PT (chimpanzee), BT (bovine), ET (lesser hedgehog), GG (chicken), TG (zebra finch), AC (anole lizard), GJ (Japanese gecko), XL (African clawed frog), XT (Western clawed frog), HF (horn shark), SA (spiny dogfish), OM (rainbow trout), GA (three-spined stickleback), DR (zebrafish) and PM (sea lamprey).

## Supplemental Table 3 – Distribution of fish ESTs among MBPs

| #  | Species         | Isoform | Size (aa) | Exons Used           | EST#   | Sample EST           |
|----|-----------------|---------|-----------|----------------------|--------|----------------------|
| 1  | Zebrafish       | i1      | 88        | I-III-B-IV-VII       | 40     | eBI842453            |
| 2  | Zebrafish       | i1      | 95        | I-III-B-IV-V-VII     | 51     | eDT072480            |
| 3  | Zebrafish       | i1      | 100       | I-III-IV-VII         | 74     | eBM026325            |
| 4  | Zebrafish       | i1      | 107       | I-III-IV-V-VII       | 90     | eBM185687            |
| 5  | Zebrafish       | i1      | 121       | I-III-V-VIA-VII      | 1      | eEB943432            |
| 6  | Zebrafish       | i1      | 125       | I-III-B-IV-VI-VI-VII | 1      | eCN321167            |
| 7  | Zebrafish       | i1      | 130       | I-III-IV-VI-VII      | 1      | eEB943432            |
| 8  | Zebrafish       | i1      | 137       | I-III-IV-V-VI-VII    | 2      | eEE310986            |
| 9  | Zebrafish       | i2      | 121       | I-III-IV-VI-VII      | 14, 6* | eEH585066            |
| 1  | 3SStickleback   | i1      | 89        | I-III-VII            | 0      | ENSGACT <sup>1</sup> |
| 2  | 3SStickleback   | i1      | 98        | I-III-IV-VII         | 30     | eDW667184            |
| 3  | 3SStickleback   | i1      | 105       | I-III-IV-V-VII       | 3      | eDN728055            |
| 4  | 3SStickleback   | i1      | 110       | I-III-IV-VI          | 26     | eDN729137            |
| 5  | 3SStickleback   | i1      | 117       | I-III-IV-V-VI        | 17     | eDW673630            |
| 6  | 3SStickleback   | i1      | 126       | I-III-IV-VI-VII      | 1      | eDT990551            |
| 7  | 3SStickleback   | i1      | 133       | I-III-IV-V-VI-VII    | 14     | eDW659603            |
| 8  | 3SStickleback   | i2      | 103       | I-III-VI             | 11     | eDW672462            |
| 9  | 3SStickleback   | i2      | 109       | I-III-IV-VIB         | 50     | eDW674726            |
| 10 | 3SStickleback   | i2      | 112       | I-III-IV-VI          | 35     | eDW677337            |
| 11 | 3SStickleback   | i2      | 113       | I-III-VI-VII         | 23     | eDW629894            |
| 12 | 3SStickleback   | i2      | 122       | I-III-IV-VIB-VII     | 60     | eDW673311            |
| 13 | 3SStickleback   | i2      | 132       | I-III-IV-V-VI-VII    | 11     | eDV001698            |
| 1  | Japanese medaka | i1      | 88        | I-III-VII            | 30     | eDK007816            |
| 2  | Japanese medaka | i1      | 97        | I-III-IV-VII         | 4      | eDK032516            |
| 3  | Japanese medaka | i1      | 110       | I-III-IV-VI          | 12     | eDK136918            |
| 4  | Japanese medaka | i1      | 116       | I-III-IV-V-VI        | 2      | eDK019076            |
| 5  | Japanese medaka | i1      | 125       | I-III-IV-VI-VII      | 1      | eBJ704935            |
| 6  | Japanese medaka | i1      | 132       | I-III-IV-V-VI-VII    | 3      | eBJ710656            |
| 7  | Japanese medaka | i2      | 106       | I-III-IV-VI          | 15     | eDK019684            |
| 8  | Japanese medaka | i2      | 116       | I-III-IV-VI-VII      | 7      | eDK018223            |
| 9  | Japanese medaka | i2      | 119       | I-III-IV-V-VI        | 28     | eAU170757            |
| 10 | Japanese medaka | i2      | 129       | I-III-IV-V-VI-VII    | 10     | eDK018383            |
| 1  | Flathead minnow | i1      | 100       | I-III-IV-VII         | >100   | eDT262403            |
| 2  | Flathead minnow | i1      | 107       | I-III-IV-V-VII       | >100   | eDT261883            |
| 3  | Flathead minnow | i1      | 118       | I-III-B-IV-VI-VII    | 1      | eDT259066            |
| 4  | Flathead minnow | i1      | 125       | I-III-B-IV-V-VI-VII  | 2      | eDT255738            |
| 5  | Flathead minnow | i1      | 130       | I-III-IV-VI-VII      | 2      | eDT248986            |
| 6  | Flathead minnow | i1      | 137       | I-III-IV-V-VI-VII    | 4      | eDT249557            |
| 7  | Flathead minnow | i2      | 106       | I-III-IV-VI          | 2      | eDT204593            |
| 8  | Flathead minnow | i2      | 119       | I-III-IV-VI-VII      | 2, 1*  | eDT248459            |

<sup>1</sup> A single 89 amino acid long stickleback MBP entry (ENSGACT00000003314), having no matching ESTs was obtained from Ensembl.

Legend: Sequences were almost entirely from the NCBI EST database and sample entries are designated with a small e in front to indicate that the accession number is an EST. Numbers of hits with matching sequence (includes hits with 12 sequencing errors) were identified. Sizes of translated products are indicated by the numbers of amino acids (aa). In some cases the ESTs covered only a portion of the sequence and was included only if there was enough sequence to determine which they represented (\*).

## Supplemental Table 4 – Accession numbers of orthologs and paralogs of genes encoding compact myelin proteins in invertebrate genomes

| Gene       | Species    |                        |            |            |                 |             |                           |             |
|------------|------------|------------------------|------------|------------|-----------------|-------------|---------------------------|-------------|
|            | Lancelet   | Sea squirt             | Sea urchin | Owl limpet | Polychaete worm | Fruit fly   | Roundworm                 | Sea anemone |
| PLP1       | EEA46102   | 298915                 | XP_799989  | 165539     | 228771          | AAF71284    | XP_001902103 <sup>1</sup> | --          |
| PLP1-PFAM  | 14-249/250 | 2-234/259              | 3-270/300  | 3-242/262  | 2-219/237       | 3-232/248   | 275                       | --          |
| PMP2       | 75082      | 298288                 | 14303      | 150380     | 21682           | NP_00102780 | 14426                     | --          |
| Paralog    | RBP2       | FABP5                  | FABP5      | FABP5      | FABP3           | FABP7       | FABP4                     | --          |
| PMP2-PFAM  | 7-133/134  | 6-136/136              | 5-134      | 9-138/138  | 6-135/135       | 4-130       |                           | --          |
| STMN1      | eBW736488  | SINCSAVESTT00000003297 | 04713      | 118291     | eEY544474       | eFE195452   | --                        | eFC263895   |
| STMN1-PFAM | 7-145/148  | 8-149/161              | 3-137/147  | 1-132/140  | 1-134/140       | 5-142/144   | --                        | 13-144/153  |

<sup>1</sup>Roundworm (*Brugia malaya*) sequence was used as no *Caenorhabditis elegans* sequence was identified.

Legend: Proteins related to PLP1, PMP2 and STMN1 were either identified through BLASTP and TBLASTN searches of available databases (Methods). The PFAM domains for PLP1, PMP2 and STMN1 are myelin\_PLP, lipocalin and stathmin, respectively (Table 2). The closest sea squirt hit to STMN1 was from *Ciona Savignyi* (Ensembl). Dashes indicate absence of invertebrate homologs.
